# Supplementary material
Source: PubMed Central journal article supplement (PMC4217638)
Supplement: supp_mcu095_mcu095supp.pdf [file supp_mcu095_mcu095supp.pdf]

SUPPLEMENTARY DATA

**Fig. S1.** Time course of  $^{13}\text{C}$  discrimination ( $\delta^{13}\text{C}$ ) in garden cress (*Lepidium sativum*) plantlets grown from seed for up to 21 days after watering (DAW) in air or helox atmosphere at high (HH; A,D,G) or low humidity (LH; B,E,H), under total pressure reduced to one-half of normal pressure (RP: C,F,I), and at three different atmospheric  $\text{CO}_2$  mixing ratios  $C_a$ : subambient ( $180\ \mu\text{mol mol}^{-1}$ ; A–C), ambient ( $400\ \mu\text{mol mol}^{-1}$ ; D–F) or superambient ( $800\ \mu\text{mol mol}^{-1}$ ; G–I). Isotopic compositions of  $\text{CO}_2$  in the mixed atmosphere ( $\delta_a$ ) and of seed carbon ( $\delta_s$ ) were  $-28.19\ ‰$  and  $-28.13\ ‰$ , respectively. Means and standard deviations ( $n = 3$ ) are shown. The data indicate that (i)  $\delta$  of cotyledons at 0, 7, 14 and 21 DAW follows a sigmoid-like time course and approaches the  $\delta$  value of true leaves after 21 days; (ii) helox-grown plants were almost always depleted in  $^{13}\text{C}$  compared to air-grown plants; (iii)  $^{13}\text{C}$  discrimination increases ( $\delta$  becomes more negative) with rising  $C_a$ ; (iv) the discrimination in hypobaric plants (RP) is remarkably decreased (less negative  $\delta$ ) than in plants grown at normal atmospheric pressure with similar  $C_a$  (compare RP at 800/2 with LH at 400 and RP at 400/2 with LH at 180  $\mu\text{mol mol}^{-1}$ ).

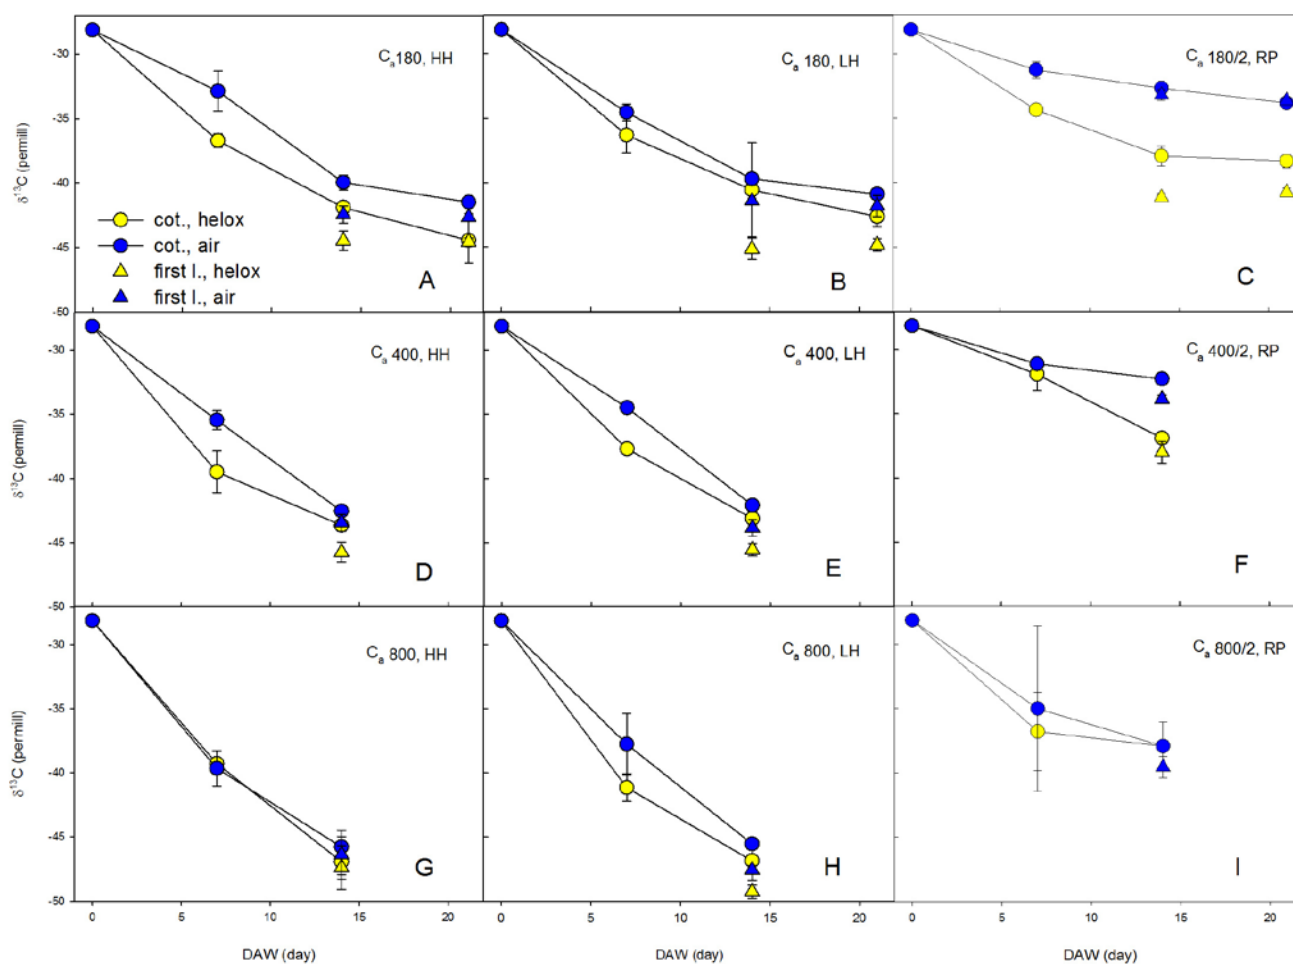

**Fig. S2.** Time course of stomatal density in garden cress (*Lepidium sativum*) plantlets grown from seed for up to 21 days after watering (DAW) in air or helox atmosphere at high (HH; A,D,G) or low humidity (LH; B,E,H), under total pressure reduced to one-half of normal pressure (RP; C,F,I), and at three different atmospheric CO<sub>2</sub> mixing ratios  $C_a$ : subambient (180  $\mu\text{mol mol}^{-1}$ ; A–C), ambient (400  $\mu\text{mol mol}^{-1}$ ; D–F) or superambient (800  $\mu\text{mol mol}^{-1}$ ; G–I). Data points are means of total number of stomata per  $\text{mm}^{-2}$  of projected leaf area (adaxial plus abaxial side) of counts on 60 areas in samples from three plants. Bars represent standard deviations. The data indicate that (i) stomatal density in cotyledons is insensitive to  $C_a$  as well as to atmospheric humidity and to reduced atmospheric pressure; (ii) stomatal density of true leaves decreases with increasing  $C_a$  and reduced atmospheric humidity; (iii) stomatal density on hypobaric plant leaves is increased compared to plants grown under normal pressure.

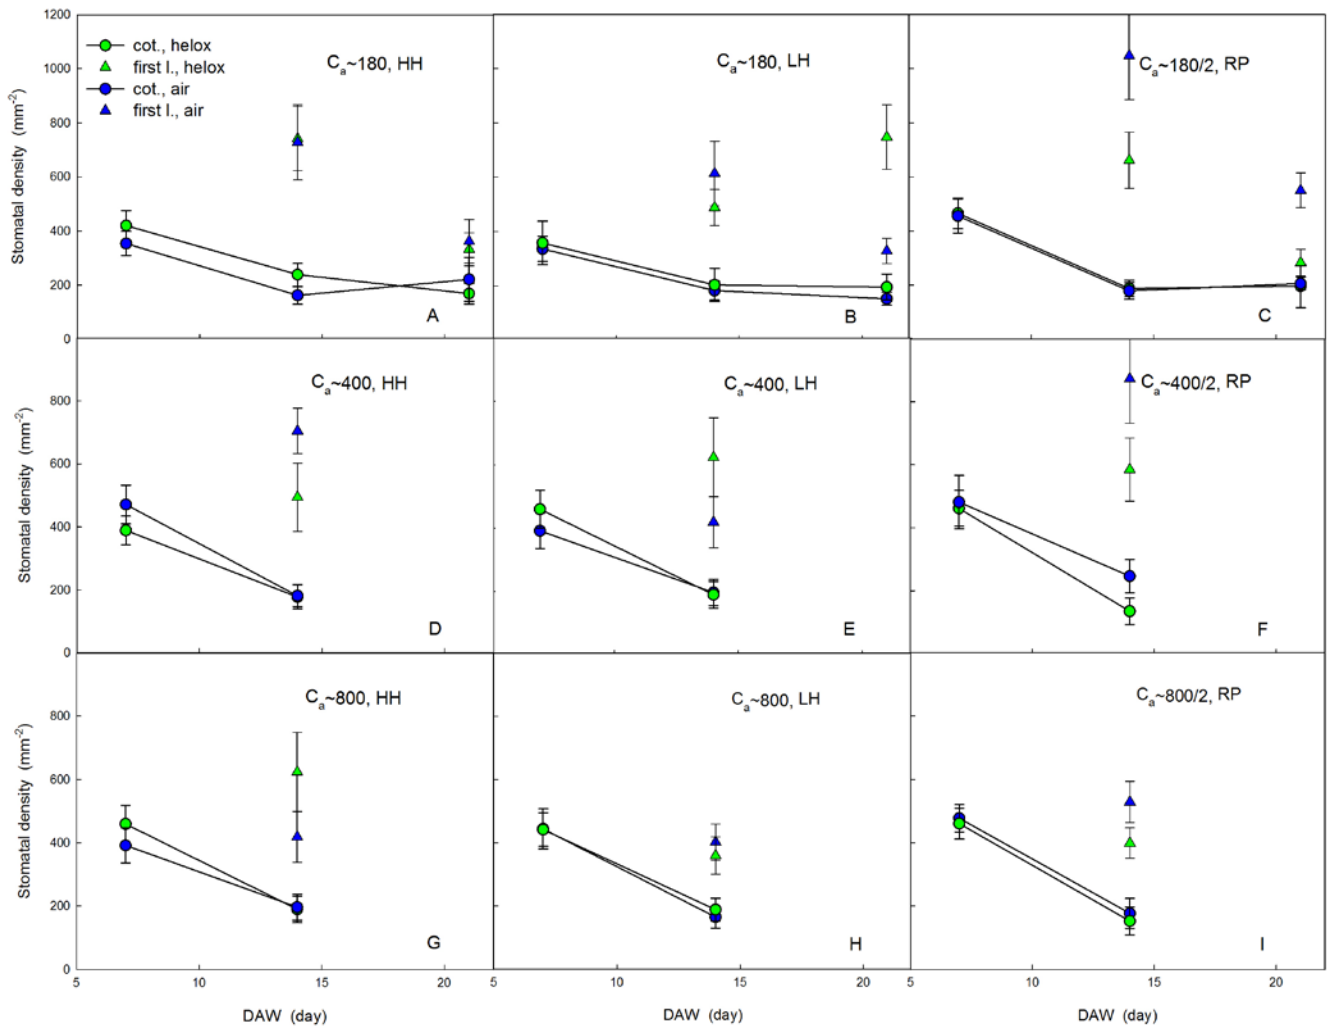

**Fig. S3.** Kinetics of seed-derived carbon in cotyledons of garden cress plants grown at three different ambient CO<sub>2</sub> concentrations from seeds for 14–21 days after the seed watering (DAW) in artificially mixed atmosphere. Other growth conditions are described in legend of Figs S1 and S2. Sigmoid regression curves are shown. The fraction of seed-derived carbon  $f$  was calculated from time-course of carbon isotope composition  $\delta^{13}\text{C}$  in dry matter of the cotyledons and true leaves.

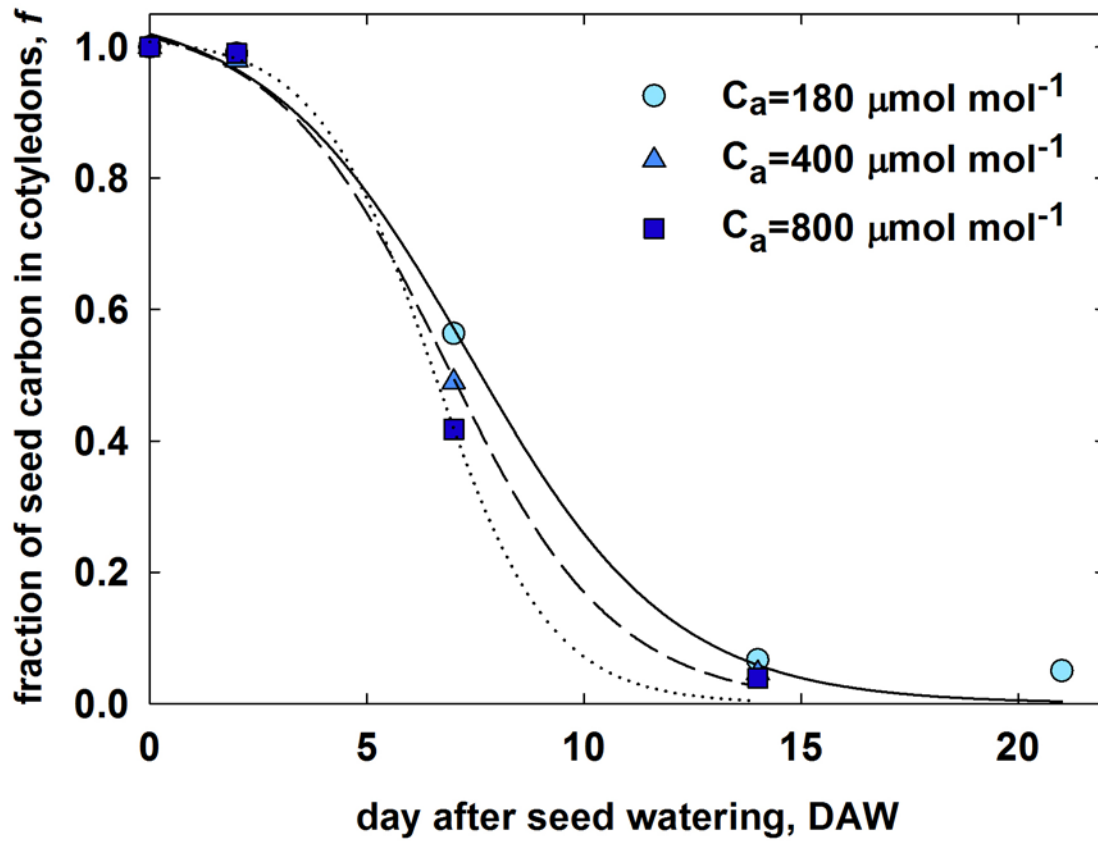

**Fig. S4.** Details of the stomatal density SD, pavement cell density PCD and stomatal index SI response of garden cress true leaves and cotyledons to leaf internal CO<sub>2</sub> concentration C<sub>i</sub>. The plants were grown for 21 days at PPFD of 100, 170, 240, 310, 380, 450, 520, 590 μmol (photons) m<sup>-2</sup> s<sup>-1</sup>. The data showing total SD, PCD and SI values summed (SD, PCD) or averaged (SI) over both leaf sides are presented in Fig. 4 of the main text. Here, we present values separately for adaxial and abaxial leaf sides and in the form of differences between treatments (all irradiance levels except 310 μmol m<sup>-2</sup> s<sup>-1</sup>) and the “control” arbitrarily set as the optimum irradiance of 310 μmol m<sup>-2</sup> s<sup>-1</sup>.

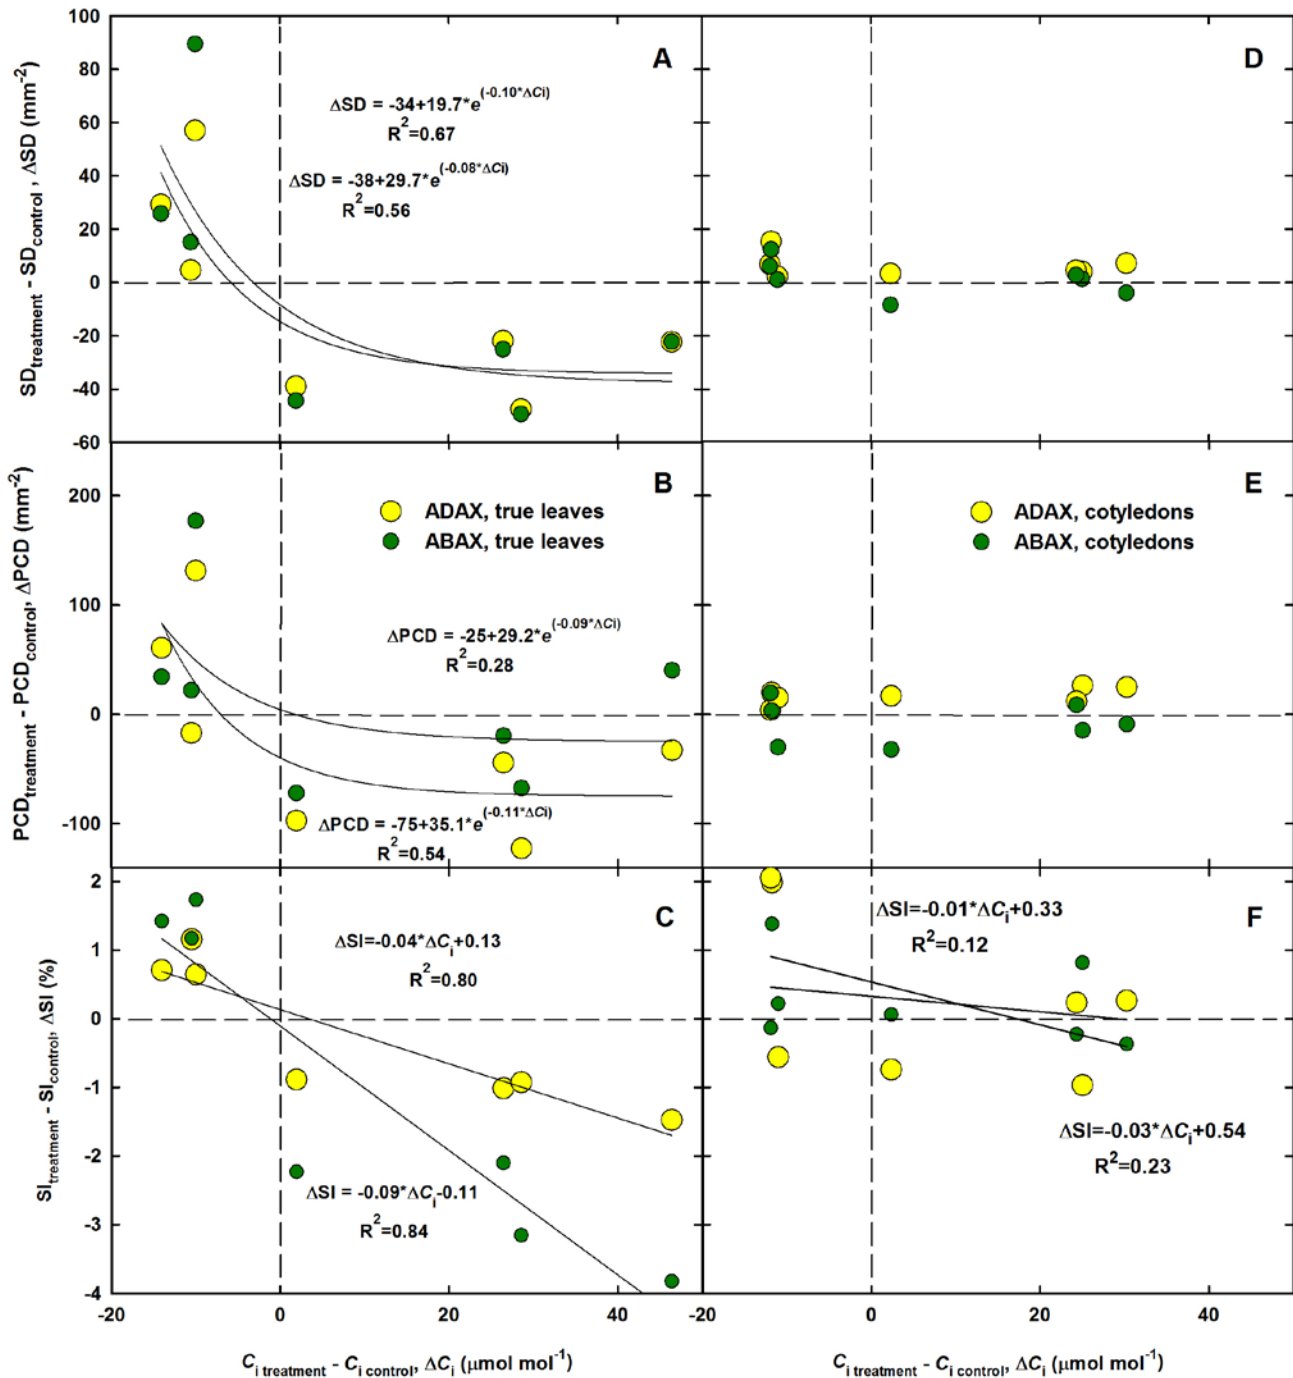

**Table S1.** Carbon isotope discrimination ( $\delta$ ) and stomatal density (SD) data compiled from published controlled factorial experiments with dicotyledonous plants. The differences of  $\delta$  and SD between treatments (t) and the respective controls (c) were used in calculation of the treatment effect on leaf internal CO<sub>2</sub> concentration ( $C_i$ ) using equation 3 and in plotting the  $C_i$  response of SD (Fig. 5).

| No | species                            | variant   | treatment/level          | $\delta$ air<br>[‰] | $C_a$ | SD<br>mm <sup>-2</sup> | $\Delta$ or $\delta$ | $C_i$ | diff. c-t       |      | difference treat-control |           | Source                        |
|----|------------------------------------|-----------|--------------------------|---------------------|-------|------------------------|----------------------|-------|-----------------|------|--------------------------|-----------|-------------------------------|
|    |                                    |           |                          |                     |       |                        |                      |       | $\delta$<br>[‰] | SD   | $C_i$                    | SD<br>[%] |                               |
| 1  | <i>Vigna sinensis</i>              | control c |                          | -8                  | 380   | 440                    | 16.1                 | 180.0 |                 |      |                          |           | Sekiya & Yano, 2008           |
|    |                                    | treated t | P nutrition, soil water, | -8                  | 380   | 244                    | 19.4                 | 231.7 | 3.4             | 196  | 51.7                     | -45       |                               |
| 2  | <i>Glycine max</i>                 | c         | -UV                      | -8                  | 380   | 170                    | 19.5                 | 233.3 |                 |      |                          |           | Gitz III <i>et al.</i> , 2005 |
|    |                                    | t         | UV-B                     | +UV                 | -8    | 380                    | 100                  | 18.0  | 210.1           | -1.5 | -70                      | -23.2     |                               |
| 3  | <i>Frenelopsis</i><br>(3 species)  | c         |                          | -8                  | 380   | 60                     | -27.8                | 237.9 |                 |      |                          |           | Aucour <i>et al.</i> , 2008   |
|    |                                    | t         | salinity                 |                     | -8    | 380                    | 168                  | -20.8 | 129.8           | -7.0 | 108                      | -108.1    |                               |
| 4  | <i>Lycopersicon<br/>esculentum</i> | c         | -ABA                     | -8                  | 380   | 207                    | -29.6                | 265.8 |                 |      |                          |           | Bradford <i>et al.</i> , 1983 |
|    |                                    | t         | ABA                      | +ABA                | -8    | 380                    | 248                  | -29.1 | 257.7           | -0.5 | 41                       | -8.2      |                               |
| 5  | <i>Solenites<br/>vimineus</i>      | c         | high (1896)              | -8                  | 380   | 45                     | -26.3                | 214.7 |                 |      |                          |           | Yan <i>et al.</i> , 2009      |
|    |                                    | t         | CO2                      | low (1512)          | -8    | 380                    | 38                   | -27.8 | 237.9           | 1.5  | -7                       | 23.2      |                               |
| 6  | <i>Arabidopsis<br/>thai., Col.</i> | c         | -UV                      | -8                  | 380   | 563                    | 22.9                 | 285.9 |                 |      |                          |           | Lake <i>et al.</i> , 2009     |
|    |                                    | t         | UV-B                     | +UV                 | -8    | 380                    | 369                  | 24.3  | 307.2           | 1.4  | 194                      | 21.3      |                               |
| 7  | <i>Parashorea<br/>chinensis</i>    | c         | 50 m                     | -8                  | 380   | 558                    | -27.8                | 237.1 |                 |      |                          |           | He <i>et al.</i> , 2008       |
|    |                                    | t         | tree height              | 35 m                | -8    | 380                    | 503                  | -29.1 | 258.4           | 1.4  | -55                      | 21.3      |                               |
| 8  | <i>Oleandra<br/>pistillaris</i>    | c         | open                     | -8                  | 380   | 229                    | -29.9                | 270.3 |                 |      |                          |           | Takahashi & Mikami,<br>2006   |
|    |                                    | t         | canopy                   | understorey         | -8    | 380                    | 167                  | -32.6 | 312.0           | 2.7  | -62                      | 41.7      |                               |
| 9  | <i>Ginkgo biloba</i>               | c         | lit                      | -8                  | 380   | 96                     | -26.6                | 219.3 |                 |      |                          |           | Sun <i>et al.</i> , 2003      |
|    |                                    | t         | shaded                   | -8                  | 380   | 79                     | -24.6                | 188.5 | -2.0            | -17  | -30.9                    | -18       |                               |
|    |                                    | c         | lit                      | -8                  | 380   | 113                    | -29.3                | 261.1 |                 |      |                          |           |                               |
|    |                                    | t         | irradiance               | shaded              | -8    | 380                    | 91                   | -29.9 | 270.3           | 0.6  | -22                      | 9.3       |                               |

|    |                                |           |                        |                 |     |     |       |       |       |      |      |       |     |                                   |
|----|--------------------------------|-----------|------------------------|-----------------|-----|-----|-------|-------|-------|------|------|-------|-----|-----------------------------------|
| 10 | <i>Acacia koa</i>              | control c | lit                    | -8              | 380 | 237 | -28.0 | 241.1 |       |      |      |       |     |                                   |
|    |                                | treat. t  | med. shaded            | -8              | 380 | 207 | -29.7 | 267.4 | 1.7   | -30  | 26.2 | -13   |     |                                   |
|    |                                | c         | irradiance, 100 % soil | lit             | -8  | 380 | 237   | -28.0 | 241.1 |      |      |       |     |                                   |
|    |                                | t         | water capacity         | shaded          | -8  | 380 | 111   | -31.8 | 299.8 | 3.8  | -127 | 58.7  | -53 |                                   |
|    |                                | c         |                        | lit             | -8  | 380 | 263   | -27.1 | 227.8 |      |      |       |     |                                   |
|    |                                | t         |                        | med. shaded     | -8  | 380 | 237   | -29.0 | 256.7 | 1.9  | -26  | 29.0  | -10 |                                   |
|    |                                | c         | Irradiance, 20 % soil  | lit             | -8  | 380 | 263   | -27.1 | 227.8 |      |      |       |     |                                   |
|    |                                | t         | water capacity         | shaded          | -8  | 380 | 123   | -31.6 | 296.1 | 4.4  | -140 | 68.3  | -53 | Craven <i>et al.</i> , 2010       |
| 11 | <i>Pinus sylvestris</i>        | c         | high (560)             | -8              | 560 | 102 | 18.9  | 330.1 |       |      |      |       |     |                                   |
|    |                                | t         | CO2                    | low (~360)      | -8  | 360 | 127   | 20.6  | 236.3 | 1.7  | 25   | -94   | 24  |                                   |
|    |                                | c         |                        | lit             | -8  | 360 | 102   | 18.9  | 212.0 |      |      |       |     |                                   |
|    |                                | t         | irradiance             | shaded          | -8  | 360 | 81    | 20.2  | 231.2 | 1.3  | -21  | 19.2  | -21 | Beerling 1997                     |
| 12 | <i>Arabidopsis thal., Col.</i> | c         | warm (25oC)            | -8              | 380 | 240 | -29.7 | 267.2 |       |      |      |       |     |                                   |
|    |                                | t         | temperature            | cold (5oC)      | -8  | 380 | 470   | -28.4 | 247.2 | -1.3 | 230  | -20.1 | 96  | Gorsuch <i>et al.</i> , 2010      |
| 13 | <i>Pinus flexilis</i>          | c         | low (glacial)          | -5              | 180 | 117 | -22.3 | 94.5  |       |      |      |       |     |                                   |
|    |                                | t         | CO2                    | high (holocene) | -6  | 280 | 97    | -23.8 | 152.5 | 1.5  | -20  | 58    | -17 | Van de Water <i>et al.</i> , 1994 |
| 14 | <i>Solanum tuberosum</i>       | c         |                        | medium          | -8  | 380 | 197   | 19.8  | 237.1 |      |      |       |     |                                   |
|    |                                | t         | N nutr. DI             | low             | -8  | 380 | 115   | 20.0  | 240.2 | 0.2  | -82  | 3.1   | -42 |                                   |
|    |                                | c         |                        | medium          | -8  | 380 | 197   | 19.8  | 237.1 |      |      |       |     |                                   |
|    |                                | t         | N nutr. DI             | high            | -8  | 380 | 214   | 18.9  | 224.6 | -0.8 | 17   | -12.5 | 9   |                                   |
|    |                                | c         |                        | medium          | -8  | 380 | 166   | 19.3  | 230.6 |      |      |       |     |                                   |
|    |                                | t         | N nutr. PRD            | low             | -8  | 380 | 142   | 19.3  | 230.2 | 0.0  | -24  | -0.5  | -14 |                                   |
|    |                                | c         |                        | medium          | -8  | 380 | 166   | 19.3  | 230.6 |      |      |       |     |                                   |
|    |                                | t         | N nutr. PRD            | high            | -8  | 380 | 157   | 19.5  | 233.3 | 0.2  | -9   | 2.6   | -5  | Yan <i>et al.</i> , 2012          |

|    |                                      |   |            |      |    |     |     |       |       |      |     |       |     |                          |
|----|--------------------------------------|---|------------|------|----|-----|-----|-------|-------|------|-----|-------|-----|--------------------------|
| 15 | <i>Vitis vinifera</i>                | c |            | warm |    |     |     | 117   | 275.4 |      |     |       |     | Rogiers & Clarke, 2013   |
|    |                                      | t | root temp. | cool |    |     |     | 128   | 262.3 | 11   | -13 | 10    |     |                          |
| 16 | <i>Betula mioluminifera</i>          | c |            | low  | -6 | 316 | 256 | -29.1 | 240.6 |      |     |       |     | Sun <i>et al.</i> , 2012 |
|    |                                      | t |            | high | -6 | 387 | 207 | -30.9 | 321.7 | 1.7  | -49 | 81    | -19 |                          |
| 17 | <i>Carpinus miofangiana</i>          | c |            | low  | -6 | 316 | 278 | -28.3 | 229.7 |      |     |       |     |                          |
|    |                                      | t | CO2        | high | -6 | 387 | 244 | -30.3 | 313.1 | 2.0  | -34 | 83    | -12 |                          |
| 17 | <i>Medicago sativa</i> ,             | c |            | 75   | -8 | 380 | 118 | -29.6 | 265.7 |      |     |       |     | He <i>et al.</i> , 2012  |
|    |                                      | t |            | 25   | -8 | 380 | 185 | -27.6 | 234.0 | -2.1 | 67  | -31.7 | 57  |                          |
|    | cv. Algonquin, Longdon, Xinjiangdaye | c |            | 75   | -8 | 380 | 154 | -29.4 | 263.1 |      |     |       |     |                          |
|    |                                      | t |            | 25   | -8 | 380 | 182 | -27.5 | 232.9 | -2.0 | 28  | -30.1 | 18  |                          |
|    | soil water capacity (%)              | c |            | 75   | -8 | 380 | 139 | -29.6 | 265.2 |      |     |       |     |                          |
|    |                                      | t |            | 25   | -8 | 380 | 152 | -27.7 | 236.0 | -1.9 | 13  | -29.2 | 9   |                          |
